# Supplementary material for: Data-driven modeling of cellular stimulation, signaling and output response in RAW 264.7 cells
Source: PubMed Central journal article supplement (PMC2441624; doi:10.1186/1750-2187-3-11), 2008-05-22

**Supplemental Figure 1: Segment diagrams of the squared weighted VIP profile for G-CSF, IL-1 $\alpha$ , IL-6, IL-10, MIP-1 $\alpha$  and TNF $\alpha$ .** For each cytokine, ten PLS models were generated through a 10-fold cross validation and then a weighted VIP score was computed as described in Materials and Methods to select important signaling metrics. A segment plot was produced for each protein, with the radial length of each segment indicating the magnitude of the squared weighted VIP score for individual metrics. VIP scores greater than 1 (dashed circle) are classified as significant metrics for each cytokine.

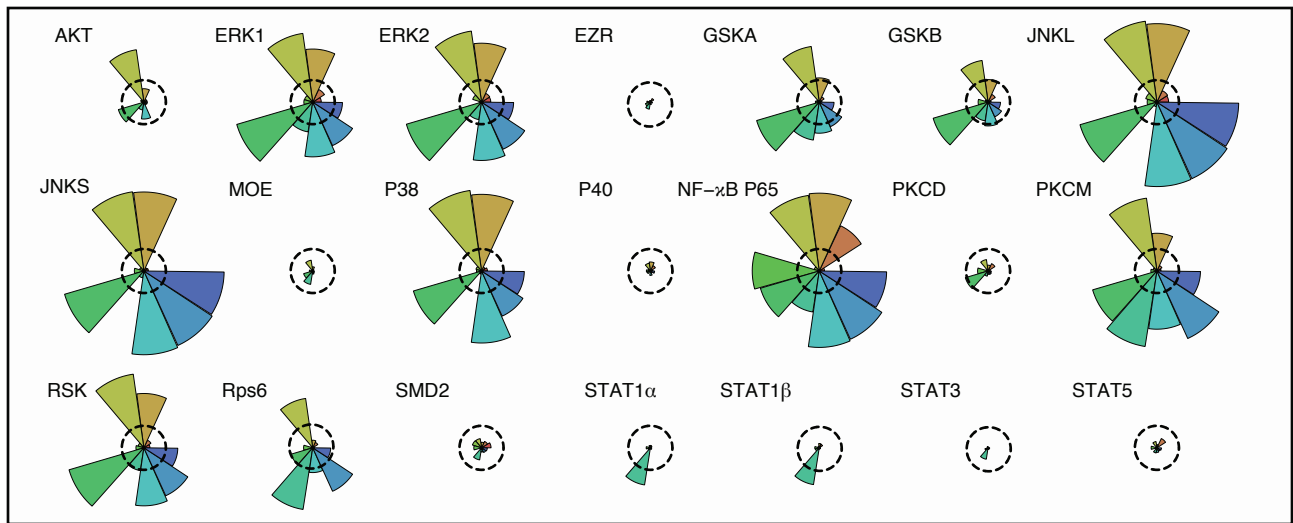

(a) G-CSF

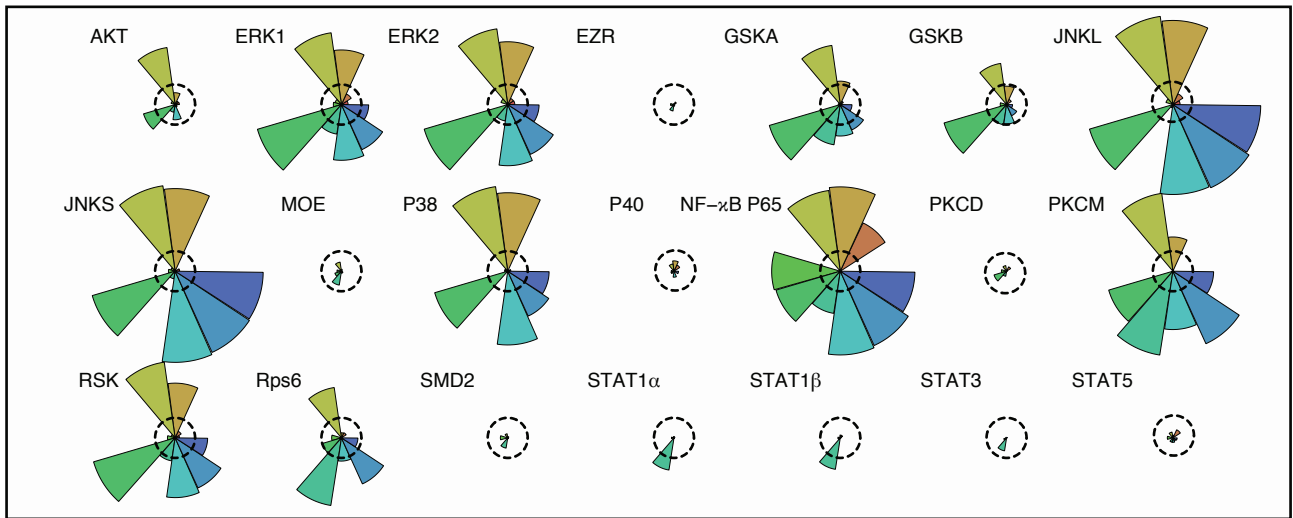

(b) IL-1 $\alpha$

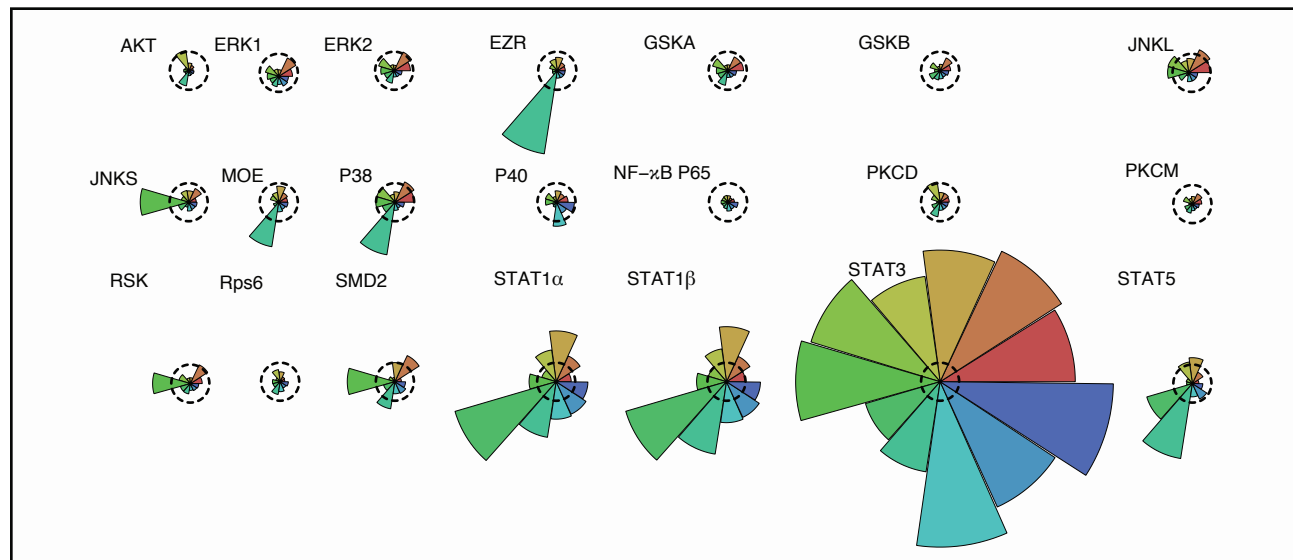

(c) IL-6

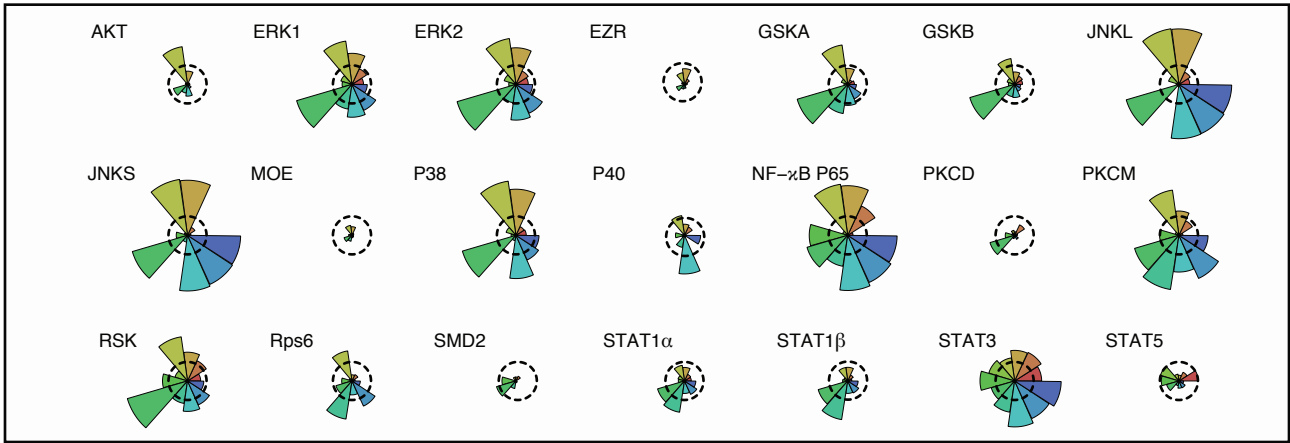

(d) IL-10

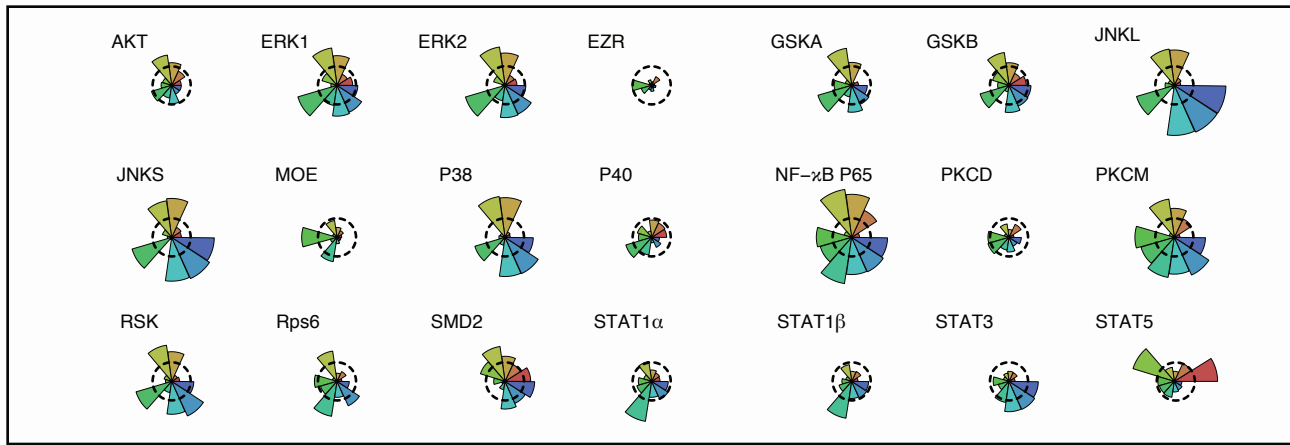

(e) MIP-1 $\alpha$

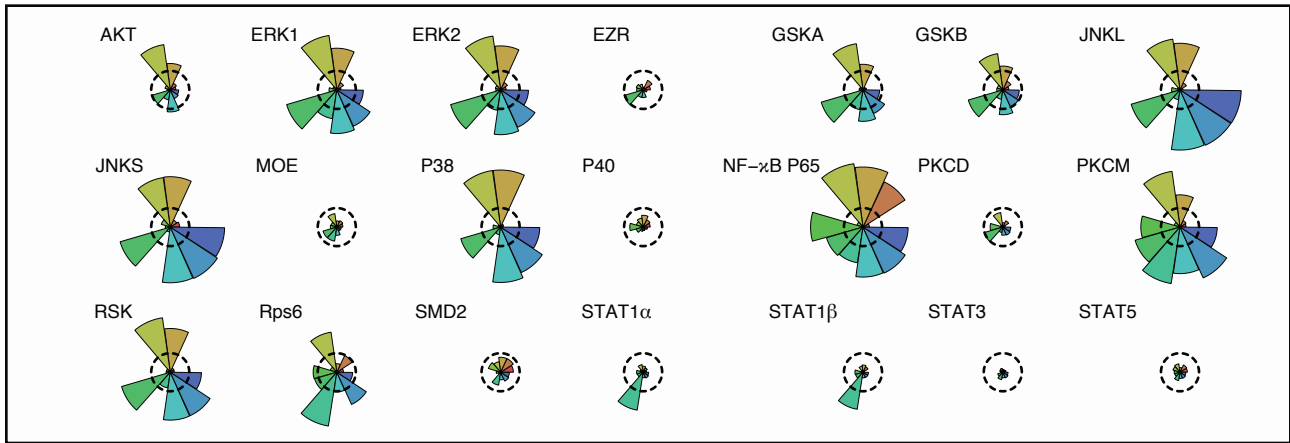

(f) TNF $\alpha$

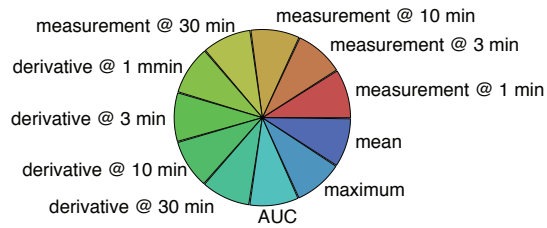

Supplement: 1750-2187-3-11-S1.pdf [file 1750-2187-3-11-S1.pdf]
