# Supplementary material for: Data-driven modeling of cellular stimulation, signaling and output response in RAW 264.7 cells
Source: J Mol Signal. 2008 May 22;3:11. doi: 10.1186/1750-2187-3-11 (PMC2441624; doi:10.1186/1750-2187-3-11)
Supplement: Additional file 2 — Experimental conditions used in model creation. These conditions were identical for both protein phosphorylation state and cytokine output response measurements. Abbreviations: 2MA – 2-Methyl-thio-ATP; IFA – Interferon-alpha; IL-6 – Interleukin-6; ISO – Isoproterenol; LPA – Lysophosphatidic acid; LPS – Lipopolysaccharide; PAF – Platelet Activating Factor; PGE – Prostaglandin E2; S1P – Sphingosine-1-phosphate; UDP – Uridine 5'-diphosphate. [file 1750-2187-3-11-S2.pdf]

**Supplemental Table 1: Experimental conditions used in model creation**

|  | Ligand 1 | Concentration | Ligand 2 | Concentration |
|--|----------|---------------|----------|---------------|
|  | 2MA      | 500 $\mu$ M   |          |               |
|  | IL-6     | 300 pM        |          |               |
|  | IFA      | 1 nM          |          |               |
|  | ISO      | 50 nM         |          |               |
|  | LPA      | 2.5 $\mu$ M   |          |               |
|  | LPS      | 100 ng/mL     |          |               |
|  | PAF      | 100 nM        |          |               |
|  | PGE      | 10 $\mu$ M    |          |               |
|  | S1P      | 1 $\mu$ M     |          |               |
|  | UDP      | 25 $\mu$ M    |          |               |
|  | 2MA      | 500 $\mu$ M   | IL-6     | 300 pM        |
|  | 2MA      | 500 $\mu$ M   | IFA      | 1 nM          |
|  | 2MA      | 500 $\mu$ M   | ISO      | 50 nM         |
|  | 2MA      | 500 $\mu$ M   | LPA      | 2.5 $\mu$ M   |
|  | 2MA      | 500 $\mu$ M   | LPS      | 100 ng/mL     |
|  | 2MA      | 500 $\mu$ M   | PAF      | 100 nM        |
|  | 2MA      | 500 $\mu$ M   | PGE      | 10 $\mu$ M    |
|  | 2MA      | 500 $\mu$ M   | S1P      | 1 $\mu$ M     |
|  | 2MA      | 500 $\mu$ M   | UDP      | 25 $\mu$ M    |
|  | IL-6     | 300 pM        | IFA      | 1 nM          |
|  | IL-6     | 300 pM        | ISO      | 50 nM         |
|  | IL-6     | 300 pM        | LPA      | 2.5 $\mu$ M   |
|  | IL-6     | 300 pM        | LPS      | 100 ng/mL     |
|  | IL-6     | 300 pM        | PAF      | 100 nM        |
|  | IL-6     | 300 pM        | PGE      | 10 $\mu$ M    |
|  | IL-6     | 300 pM        | S1P      | 1 $\mu$ M     |
|  | IL-6     | 300 pM        | UDP      | 25 $\mu$ M    |
|  | IFA      | 1 nM          | ISO      | 50 nM         |
|  | IFA      | 1 nM          | LPA      | 2.5 $\mu$ M   |
|  | IFA      | 1 nM          | LPS      | 100 ng/mL     |
|  | IFA      | 1 nM          | PAF      | 100 nM        |
|  | IFA      | 1 nM          | PGE      | 10 $\mu$ M    |
|  | IFA      | 1 nM          | S1P      | 1 $\mu$ M     |
|  | IFA      | 1 nM          | UDP      | 25 $\mu$ M    |
|  | ISO      | 50 nM         | LPA      | 2.5 $\mu$ M   |
|  | ISO      | 50 nM         | LPS      | 100 ng/mL     |
|  | ISO      | 50 nM         | PAF      | 100 nM        |
|  | ISO      | 50 nM         | PGE      | 10 $\mu$ M    |
|  | ISO      | 50 nM         | S1P      | 1 $\mu$ M     |
|  | ISO      | 50 nM         | UDP      | 25 $\mu$ M    |
|  | LPA      | 2.5 $\mu$ M   | LPS      | 100 ng/mL     |
|  | LPA      | 2.5 $\mu$ M   | PAF      | 100 nM        |
|  | LPA      | 2.5 $\mu$ M   | PGE      | 10 $\mu$ M    |
|  | LPA      | 2.5 $\mu$ M   | S1P      | 1 $\mu$ M     |
|  | LPA      | 2.5 $\mu$ M   | UDP      | 25 $\mu$ M    |
|  | LPS      | 100 ng/mL     | PAF      | 100 nM        |
|  | LPS      | 100 ng/mL     | PGE      | 10 $\mu$ M    |
|  | LPS      | 100 ng/mL     | S1P      | 1 $\mu$ M     |
|  | LPS      | 100 ng/mL     | UDP      | 25 $\mu$ M    |
|  | PAF      | 100 nM        | PGE      | 10 $\mu$ M    |
|  | PAF      | 100 nM        | S1P      | 1 $\mu$ M     |
|  | PAF      | 100 nM        | UDP      | 25 $\mu$ M    |
|  | PGE      | 10 $\mu$ M    | S1P      | 1 $\mu$ M     |
|  | PGE      | 10 $\mu$ M    | UDP      | 25 $\mu$ M    |
|  | S1P      | 1 $\mu$ M     | UDP      | 25 $\mu$ M    |

These conditions were identical for both protein phosphorylation state and cytokine output response measurements. Abbreviations: 2MA – 2-Methyl-thio-ATP; IFA – Interferon-alpha; IL-6 – Interleukin-6; ISO – Isoproterenol; LPA – Lysophosphatidic

acid; LPS – Lipopolysaccharide; PAF – Platelet Activating Factor; PGE – Prostaglandin E<sub>2</sub>; S1P - Sphingosine-1-phosphate; UDP – Uridine 5'-diphosphate.
